# Supplementary material
Source: PubMed Central journal article supplement (PMC7869028)
Supplement: NIHMS1660695-supplement-Supplementary_tables.pdf [file NIHMS1660695-supplement-Supplementary_tables.pdf]

## **Supplementary information**

---

# **An inflammatory cytokine signature predicts COVID-19 severity and survival**

---

In the format provided by the authors and unedited

## SUPPLEMENTARY TABLES

| COMPETING RISK MODEL |                     |                   |                  |
|----------------------|---------------------|-------------------|------------------|
| VARIABLES            |                     | HR (95% CI)       | Overall P-value  |
| TNF- $\alpha$        | High                | 1.63 (1.17, 2.26) | <b>0.004</b>     |
|                      | Low                 | Ref               |                  |
| IL-6                 | High                | 2.95 (2.11, 4.13) | <b>&lt;.0001</b> |
|                      | Low                 | Ref               |                  |
| IL-8                 | High                | 1.80 (1.34, 2.42) | <b>0.0001</b>    |
|                      | Low                 | Ref               |                  |
| IL-1 $\beta$         | High                | 1.01 (0.77, 1.32) | 0.9519           |
|                      | Low                 | Ref               |                  |
| SEX                  | Female              | 1.36 (1.03, 1.79) | <b>0.0282</b>    |
|                      | Male                | Ref               |                  |
| AGE                  | 50-70               | 2.18 (1.30, 3.67) | <b>&lt;.0001</b> |
|                      | >70                 | 3.95 (2.30, 6.77) |                  |
|                      | <50                 | Ref               |                  |
| RACE/ETHNICITY       | NH African American | 0.86 (0.57, 1.31) | 0.7740           |
|                      | Hispanic            | 1.04 (0.73, 1.50) |                  |
|                      | Other               | 1.00 (0.62, 1.61) |                  |
|                      | NH White            | Ref               |                  |
| DIABETES             | Yes                 | 0.98 (0.70, 1.37) | 0.8984           |
|                      | No                  | Ref               |                  |
| HYPERTENSION         | Yes                 | 0.90 (0.65, 1.24) | 0.5103           |
|                      | No                  | Ref               |                  |
| SMOKING STATUS       | Active smoker       | 1.34 (0.69, 2.60) | 0.6852           |
|                      | Quit                | 1.04 (0.73, 1.49) |                  |
|                      | Unknown             | 0.89 (0.62, 1.27) |                  |
|                      | Non-smoker          | Ref               |                  |
| CKD                  | Yes                 | 1.42 (0.92, 2.18) | 0.1159           |
|                      | No                  | Ref               |                  |
| ASTHMA               | Yes                 | 0.93 (0.49, 1.76) | 0.8274           |
|                      | No                  | Ref               |                  |
| COPD                 | Yes                 | 0.83 (0.41, 1.66) | 0.5925           |
|                      | No                  | Ref               |                  |
| CHF                  | Yes                 | 0.60 (0.29, 1.24) | 0.1668           |
|                      | No                  | Ref               |                  |
| ATRIAL FIBRILLATION  | Yes                 | 1.31 (0.86, 1.99) | 0.2105           |
|                      | No                  | Ref               |                  |
| CANCER               | Yes                 | 1.19 (0.80, 1.78) | 0.3923           |
|                      | No                  | Ref               |                  |
| SLEEP APNEA          | Yes                 | 1.32 (0.71, 2.46) | 0.3843           |
|                      | No                  | Ref               |                  |
| BMI                  | BMI>30              | 1.37 (1.01, 1.84) | <b>0.0149</b>    |
|                      | Unknown             | 2.11 (1.19, 3.74) |                  |
|                      | BMI<=30             | Ref               |                  |

**Supplementary Table S1.** Competing risk model with four cytokines, demographics and co-morbidities (n=1,097). After adjustments, IL-6, IL-8, and TNF- $\alpha$  remain significantly predictive. CKD: chronic kidney disease; COPD: chronic obstructive pulmonary disease; CHF: congestive heart failure; BMI: body mass index.

| <b>COX SURVIVAL MODEL</b>      |                     |                    |                        |
|--------------------------------|---------------------|--------------------|------------------------|
| <b>VARIABLES</b>               |                     | <b>HR (95% CI)</b> | <b>Overall P-value</b> |
| <b>TNF-<math>\alpha</math></b> | High                | 1.73 (1.18, 2.55)  | <b>0.0049</b>          |
|                                | Low                 | Ref                |                        |
| <b>IL-6</b>                    | High                | 2.58 (1.72, 3.87)  | <b>&lt;.0001</b>       |
|                                | Low                 | Ref                |                        |
| <b>IL-8</b>                    | High                | 1.41 (1.00, 2.00)  | <b>0.0491</b>          |
|                                | Low                 | Ref                |                        |
| <b>IL-1<math>\beta</math></b>  | High                | 0.90 (0.65, 1.24)  | 0.5279                 |
|                                | Low                 | Ref                |                        |
| <b>CRP</b>                     | High                | 1.31 (0.90, 1.90)  | 0.1643                 |
|                                | Low                 | Ref                |                        |
| <b>D-DIMER</b>                 | High                | 1.03 (0.69, 1.54)  | 0.8858                 |
|                                | Low                 | Ref                |                        |
| <b>FERRITIN</b>                | High                | 0.89 (0.64, 1.24)  | 0.5056                 |
|                                | Low                 | Ref                |                        |
| <b>SEX</b>                     | Female              | 1.47 (1.06, 2.05)  | <b>0.0219</b>          |
|                                | Male                | Ref                |                        |
| <b>AGE</b>                     | 50-70               | 1.95 (1.06, 3.59)  | <b>0.0001</b>          |
|                                | >70                 | 3.24 (1.75, 6.02)  |                        |
|                                | <50                 | Ref                |                        |
| <b>RACE/ETHNICITY</b>          | NH African American | 0.67 (0.40, 1.12)  | 0.1791                 |
|                                | Hispanic            | 1.07 (0.71, 1.61)  |                        |
|                                | Other               | 0.78 (0.45, 1.36)  |                        |
|                                | NH White            | Ref                |                        |
| <b>DIABETES</b>                | Yes                 | 0.82 (0.55, 1.21)  | 0.3121                 |
|                                | No                  | Ref                |                        |
| <b>HYPERTENSION</b>            | Yes                 | 1.12 (0.75, 1.66)  | 0.5930                 |
|                                | No                  | Ref                |                        |
| <b>SMOKING STATUS</b>          | Active smoker       | 1.24 (0.60, 2.57)  | 0.6208                 |
|                                | Quit                | 1.18 (0.78, 1.79)  |                        |
|                                | Unknown             | 0.85 (0.55, 1.30)  |                        |
|                                | Non-smoker          | Ref                |                        |
| <b>CKD</b>                     | Yes                 | 1.45 (0.88, 2.38)  | 0.1489                 |
|                                | No                  | Ref                |                        |
| <b>ASTHMA</b>                  | Yes                 | 1.09 (0.53, 2.23)  | 0.8171                 |
|                                | No                  | Ref                |                        |
| <b>COPD</b>                    | Yes                 | 0.92 (0.46, 1.87)  | 0.8239                 |
|                                | No                  | Ref                |                        |
| <b>CHF</b>                     | Yes                 | 0.61 (0.28, 1.35)  | 0.2245                 |
|                                | No                  | Ref                |                        |
| <b>ATRIAL FIBRILLATION</b>     | Yes                 | 1.06 (0.66, 1.70)  | 0.8136                 |
|                                | No                  | Ref                |                        |
| <b>CANCER</b>                  | Yes                 | 1.14 (0.73, 1.77)  | 0.5681                 |
|                                | No                  | Ref                |                        |
| <b>SLEEP APNEA</b>             | Yes                 | 1.41 (0.68, 2.92)  | 0.3525                 |
|                                | No                  | Ref                |                        |
| <b>BMI</b>                     | BMI>30              | 1.04 (0.73, 1.47)  | <b>&lt;.0001</b>       |
|                                | Unknown             | 4.63 (2.31, 9.27)  |                        |
|                                | BMI<=30             | Ref                |                        |
|                                |                     |                    |                        |

**Supplementary Table S2.** Cox survival model with four cytokines, demographics, co-morbidities, and inflammatory markers, including CRP, D-dimer, ferritin (n=863). After adjustments, IL-6, IL-8 and TNF- $\alpha$  remain significantly predictive. CKD: chronic kidney disease; COPD: chronic obstructive pulmonary disease; CHF: congestive heart failure; BMI: body mass index.

| Competing risk model with multiple variable adjustments |                     |                    |                  |
|---------------------------------------------------------|---------------------|--------------------|------------------|
| Variables                                               | Levels              | HR (95% CI)        | Overall P-value  |
| TNF- $\alpha$                                           | High                | 2.01 (1.32, 3.07)  | <b>0.0012</b>    |
|                                                         | Low                 | Ref                |                  |
| IL-6                                                    | High                | 2.29 (1.47, 3.55)  | <b>0.0002</b>    |
|                                                         | Low                 | Ref                |                  |
| IL-8                                                    | High                | 1.40 (0.97, 2.01)  | 0.0706           |
|                                                         | Low                 | Ref                |                  |
| IL-1 $\beta$                                            | High                | 0.89 (0.64, 1.24)  | 0.4923           |
|                                                         | Low                 | Ref                |                  |
| CRP                                                     | High                | 1.38 (0.93, 2.05)  | 0.1113           |
|                                                         | Low                 | Ref                |                  |
| D-DIMER                                                 | High                | 0.90 (0.57, 1.42)  | 0.6371           |
|                                                         | Low                 | Ref                |                  |
| FERRITIN                                                | High                | 0.90 (0.63, 1.29)  | 0.5677           |
|                                                         | Low                 | Ref                |                  |
| SEX                                                     | Female              | 1.27 (0.90, 1.80)  | 0.1713           |
|                                                         | Male                | Ref                |                  |
| AGE                                                     | 50-70               | 1.95 (1.05, 3.61)  | <b>&lt;.0001</b> |
|                                                         | >70                 | 3.46 (1.83, 6.56)  |                  |
|                                                         | <50                 | Ref                |                  |
| RACE/ETHNICITY                                          | NH African American | 0.74 (0.43, 1.28)  | 0.6492           |
|                                                         | Hispanic            | 1.00 (0.65, 1.52)  |                  |
|                                                         | Other               | 0.94 (0.53, 1.67)  |                  |
|                                                         | NH White            | Ref                |                  |
| BMI                                                     | BMI>30              | 0.99 (0.67, 1.46)  | <b>0.0005</b>    |
|                                                         | Unknown             | 3.27 (1.75, 6.11)  |                  |
|                                                         | BMI $\leq$ 30       | Ref                |                  |
| DIABETES                                                | Yes                 | 0.84 (0.56, 1.25)  | 0.3834           |
|                                                         | No                  | Ref                |                  |
| HYPERTENSION                                            | Yes                 | 1.04 (0.68, 1.58)  | 0.8743           |
|                                                         | No                  | Ref                |                  |
| SMOKING STATUS                                          | Active smoker       | 1.32 (0.58, 2.99)  | 0.4607           |
|                                                         | Quit                | 1.41 (0.90, 2.20)  |                  |
|                                                         | Unknown             | 1.03 (0.67, 1.59)  |                  |
|                                                         | Non-smoker          | Ref                |                  |
| CKD                                                     | Yes                 | 1.90 (1.10, 3.31)  | <b>0.0221</b>    |
|                                                         | No                  | Ref                |                  |
| ASTHMA                                                  | Yes                 | 1.02 (0.42, 2.46)  | 0.9640           |
|                                                         | No                  | Ref                |                  |
| CHF                                                     | Yes                 | 0.75 (0.26, 2.17)  | 0.5911           |
|                                                         | No                  | Ref                |                  |
| COPD                                                    | Yes                 | 0.90 (0.35, 2.30)  | 0.8308           |
|                                                         | No                  | Ref                |                  |
| SLEEP APNEA                                             | Yes                 | 1.65 (0.73, 3.72)  | 0.2253           |
|                                                         | No                  | Ref                |                  |
| ATRIAL FIBRILLATION                                     | Yes                 | 0.84 (0.49, 1.45)  | 0.5304           |
|                                                         | No                  | Ref                |                  |
| CANCER                                                  | Yes                 | 1.76 (1.06, 2.93)  | <b>0.0282</b>    |
|                                                         | No                  | Ref                |                  |
| SEVERITY SCORE                                          | Severe              | 4.05 (2.57, 6.37)  | <b>&lt;.0001</b> |
|                                                         | Severe with EOD     | 6.20 (3.67, 10.46) |                  |
|                                                         | Moderate            | Ref                |                  |

**Supplementary Table S3.** Competing risk model with four cytokines, demographics, co-morbidities, and laboratory measurements (n=802). After adjustments, IL-6 and TNF- $\alpha$  remain significantly predictive. CKD: chronic kidney disease; COPD: chronic obstructive pulmonary disease; CHF: congestive heart failure; BMI: body mass index.

| Competing risk models adjusting for multiple variables (Overall P-value) |                  |                  |                  |                  |                  |
|--------------------------------------------------------------------------|------------------|------------------|------------------|------------------|------------------|
| Effect                                                                   | IL-6             | IL-8             | TNF- $\alpha$    | IL-1 $\beta$     | All cytokines    |
| IL-6                                                                     | <b>&lt;.0001</b> |                  |                  |                  | <b>0.0038</b>    |
| IL-8                                                                     |                  | <b>&lt;.0001</b> |                  |                  | 0.1090           |
| TNF- $\alpha$                                                            |                  |                  | <b>&lt;.0001</b> |                  | <b>0.0152</b>    |
| IL-1 $\beta$                                                             |                  |                  |                  | 0.4816           | 0.1409           |
| SEX                                                                      | 0.3162           | 0.4602           | 0.5325           | 0.4293           | 0.3749           |
| AGE                                                                      | <b>0.0005</b>    | <b>0.0005</b>    | <b>0.0008</b>    | <b>0.0003</b>    | <b>0.0012</b>    |
| RACE / ETHNICITY                                                         | 0.6348           | 0.4411           | 0.4363           | 0.468            | 0.666            |
| DIABETES                                                                 | <b>0.0251</b>    | 0.1868           | 0.093            | 0.0709           | 0.0947           |
| HYPERTENSION                                                             | 0.3552           | 0.8798           | 0.934            | 0.7853           | 0.7574           |
| SMOKING STATUS                                                           | 0.6322           | 0.7500           | 0.6498           | 0.8288           | 0.5121           |
| CKD                                                                      | <b>0.0073</b>    | <b>0.0132</b>    | 0.0515           | <b>0.0179</b>    | <b>0.0353</b>    |
| ASTHMA                                                                   | 0.38             | 0.5425           | 0.6684           | 0.5363           | 0.4956           |
| COPD                                                                     | 0.542            | 0.3782           | 0.4989           | 0.3675           | 0.6134           |
| CHF                                                                      | 0.8534           | 0.9471           | 0.7073           | 0.7922           | 0.8496           |
| ATRIAL FIBRILLATION                                                      | <b>0.0437</b>    | <b>0.0429</b>    | 0.0712           | 0.0738           | <b>0.0422</b>    |
| CANCER                                                                   | 0.0687           | 0.0658           | <b>0.0399</b>    | 0.0679           | 0.0664           |
| SLEEP APNEA                                                              | <b>0.0172</b>    | <b>0.0083</b>    | <b>0.0068</b>    | <b>0.0086</b>    | <b>0.0115</b>    |
| SEVERITY SCORE                                                           | <b>&lt;.0001</b> | <b>&lt;.0001</b> | <b>&lt;.0001</b> | <b>&lt;.0001</b> | <b>&lt;.0001</b> |
| BMI                                                                      | <b>0.0042</b>    | <b>0.0027</b>    | <b>0.0036</b>    | <b>0.0087</b>    | <b>0.0021</b>    |
| SYSTOLIC BP MAX                                                          | <b>0.0027</b>    | <b>0.0003</b>    | <b>0.0009</b>    | <b>0.0003</b>    | <b>0.0021</b>    |
| O2 SATURATION MIN                                                        | <b>&lt;.0001</b> | <b>&lt;.0001</b> | <b>&lt;.0001</b> | <b>&lt;.0001</b> | <b>&lt;.0001</b> |
| D-DIMER                                                                  | 0.0753           | 0.0818           | 0.1557           | 0.2163           | <b>0.0404</b>    |
| ALBUMIN                                                                  | <b>0.0001</b>    | <b>0.0002</b>    | <b>0.0004</b>    | <b>0.0002</b>    | <b>0.0001</b>    |
| CALCIUM                                                                  | 0.0627           | 0.1742           | 0.2577           | 0.2785           | 0.0537           |
| CHLORIDE                                                                 | <b>0.004</b>     | <b>0.0114</b>    | <b>0.0035</b>    | <b>0.0068</b>    | <b>0.0052</b>    |
| PLATELET                                                                 | <b>&lt;.0001</b> | <b>&lt;.0001</b> | <b>&lt;.0001</b> | <b>&lt;.0001</b> | <b>&lt;.0001</b> |

**Supplementary Table S4.** Type 3 test of competing risk survival analysis for cytokine tested in ELLA and adjusted for comorbidities and laboratory/clinical metrics. After adjustment, IL-6 and TNF- $\alpha$  remain significantly predictive of survival based on a competing risk model. CKD: chronic kidney disease; COPD: chronic obstructive pulmonary disease; CHF: congestive heart failure; BMI: body mass index.

| Stratification                                                           | Effect                         | HR (95% CI)              | P-value          |
|--------------------------------------------------------------------------|--------------------------------|--------------------------|------------------|
| O <sub>2</sub> saturation                                                | <b>TNF-<math>\alpha</math></b> | <b>2.17 (1.50, 3.15)</b> | <b>&lt;.0001</b> |
|                                                                          | <b>IL-6</b>                    | <b>2.06 (1.35, 3.14)</b> | <b>0.0008</b>    |
|                                                                          | <b>IL-8</b>                    | <b>1.45 (1.01, 2.08)</b> | <b>0.0409</b>    |
|                                                                          | IL-1 $\beta$                   | 1.20 (0.86, 1.68)        | 0.2930           |
| Age Group                                                                | <b>TNF-<math>\alpha</math></b> | <b>1.99 (1.34, 2.87)</b> | <b>0.0002</b>    |
|                                                                          | <b>IL-6</b>                    | <b>2.13 (1.41, 3.22)</b> | <b>0.0003</b>    |
|                                                                          | IL-8                           | 1.42 (0.99, 2.04)        | 0.0542           |
|                                                                          | IL-1 $\beta$                   | 1.18 (0.84, 1.64)        | 0.3404           |
| Severity Score<br>(moderate, severe,<br>severe with end organ<br>damage) | <b>TNF-<math>\alpha</math></b> | <b>2.07 (1.44, 2.97)</b> | <b>&lt;.0001</b> |
|                                                                          | <b>IL-6</b>                    | <b>2.14 (1.42, 3.24)</b> | <b>0.0003</b>    |
|                                                                          | IL-8                           | 1.43 (1.00, 2.05)        | 0.0526           |
|                                                                          | IL-1 $\beta$                   | 1.17 (0.84, 1.63)        | 0.3502           |
| SOFA Severity Score <sup>#</sup><br>( $\leq 1$ , $>1$ )                  | <b>TNF-<math>\alpha</math></b> | <b>1.71 (1.14, 2.55)</b> | <b>0.0090</b>    |
|                                                                          | <b>IL-6</b>                    | <b>2.58 (1.63, 4.10)</b> | <b>&lt;.0001</b> |
|                                                                          | <b>IL-8</b>                    | <b>1.65 (1.09, 2.49)</b> | <b>0.0173</b>    |
|                                                                          | IL-1 $\beta$                   | 1.42 (0.99, 2.03)        | 0.0580           |

\*Each model includes one cytokine (n=802)

\*Covariates: sex, age, race/ethnicity, diabetes, hypertension, smoking status, chronic kidney disease (CKD), asthma, congestive heart failure (CHF), atrial fibrillation, chronic obstructive pulmonary disease (COPD), cancer, severity score, body mass index (BMI), systolic blood pressure max, O<sub>2</sub> saturation min, D-dimer, albumin, calcium, chloride, platelets.

\*O<sub>2</sub> saturation min is not in the covariates of the model stratified by O<sub>2</sub> saturation

\*Age is not in the covariates of the model stratified by age group

\*Severity score is not in the covariates of the model stratified by Severity Score

<sup>#</sup>For SOFA severity, cutoff chosen based on median, and only 663 patients were available (O<sub>2</sub> saturation and age group had similar significance in this subset, not shown).

### Supplementary Table S5.

After stratification by the most predictive variables (O<sub>2</sub> saturation, age group, and severity score), the independent predictive value of IL-6 and TNF- $\alpha$  remains, and IL-8 returns to significance. The estimates were obtained using SAS PHREG procedure and STRATA statement.
